# Supplementary material for: Characterization of normal and cancer stem-like cell populations in murine lingual epithelial organoids using single-cell RNA sequencing
Source: PubMed Central journal article supplement (PMC8595654; doi:10.1038/s41598-021-01783-5), 2021-11-16
Supplement: 41598_2021_1783_MOESM1_ESM.pdf [file 41598_2021_1783_MOESM1_ESM.pdf]

## **Supplementary information**

### **Supplementary figure legends**

**Supplementary Table 1.** Top 100 genes upregulated in cluster 7 when compared with cluster 0 in the integrated Seurat object.

**Supplementary Table 2.** Top 100 genes upregulated in cluster 0 when compared with cluster 7 in the integrated Seurat object.

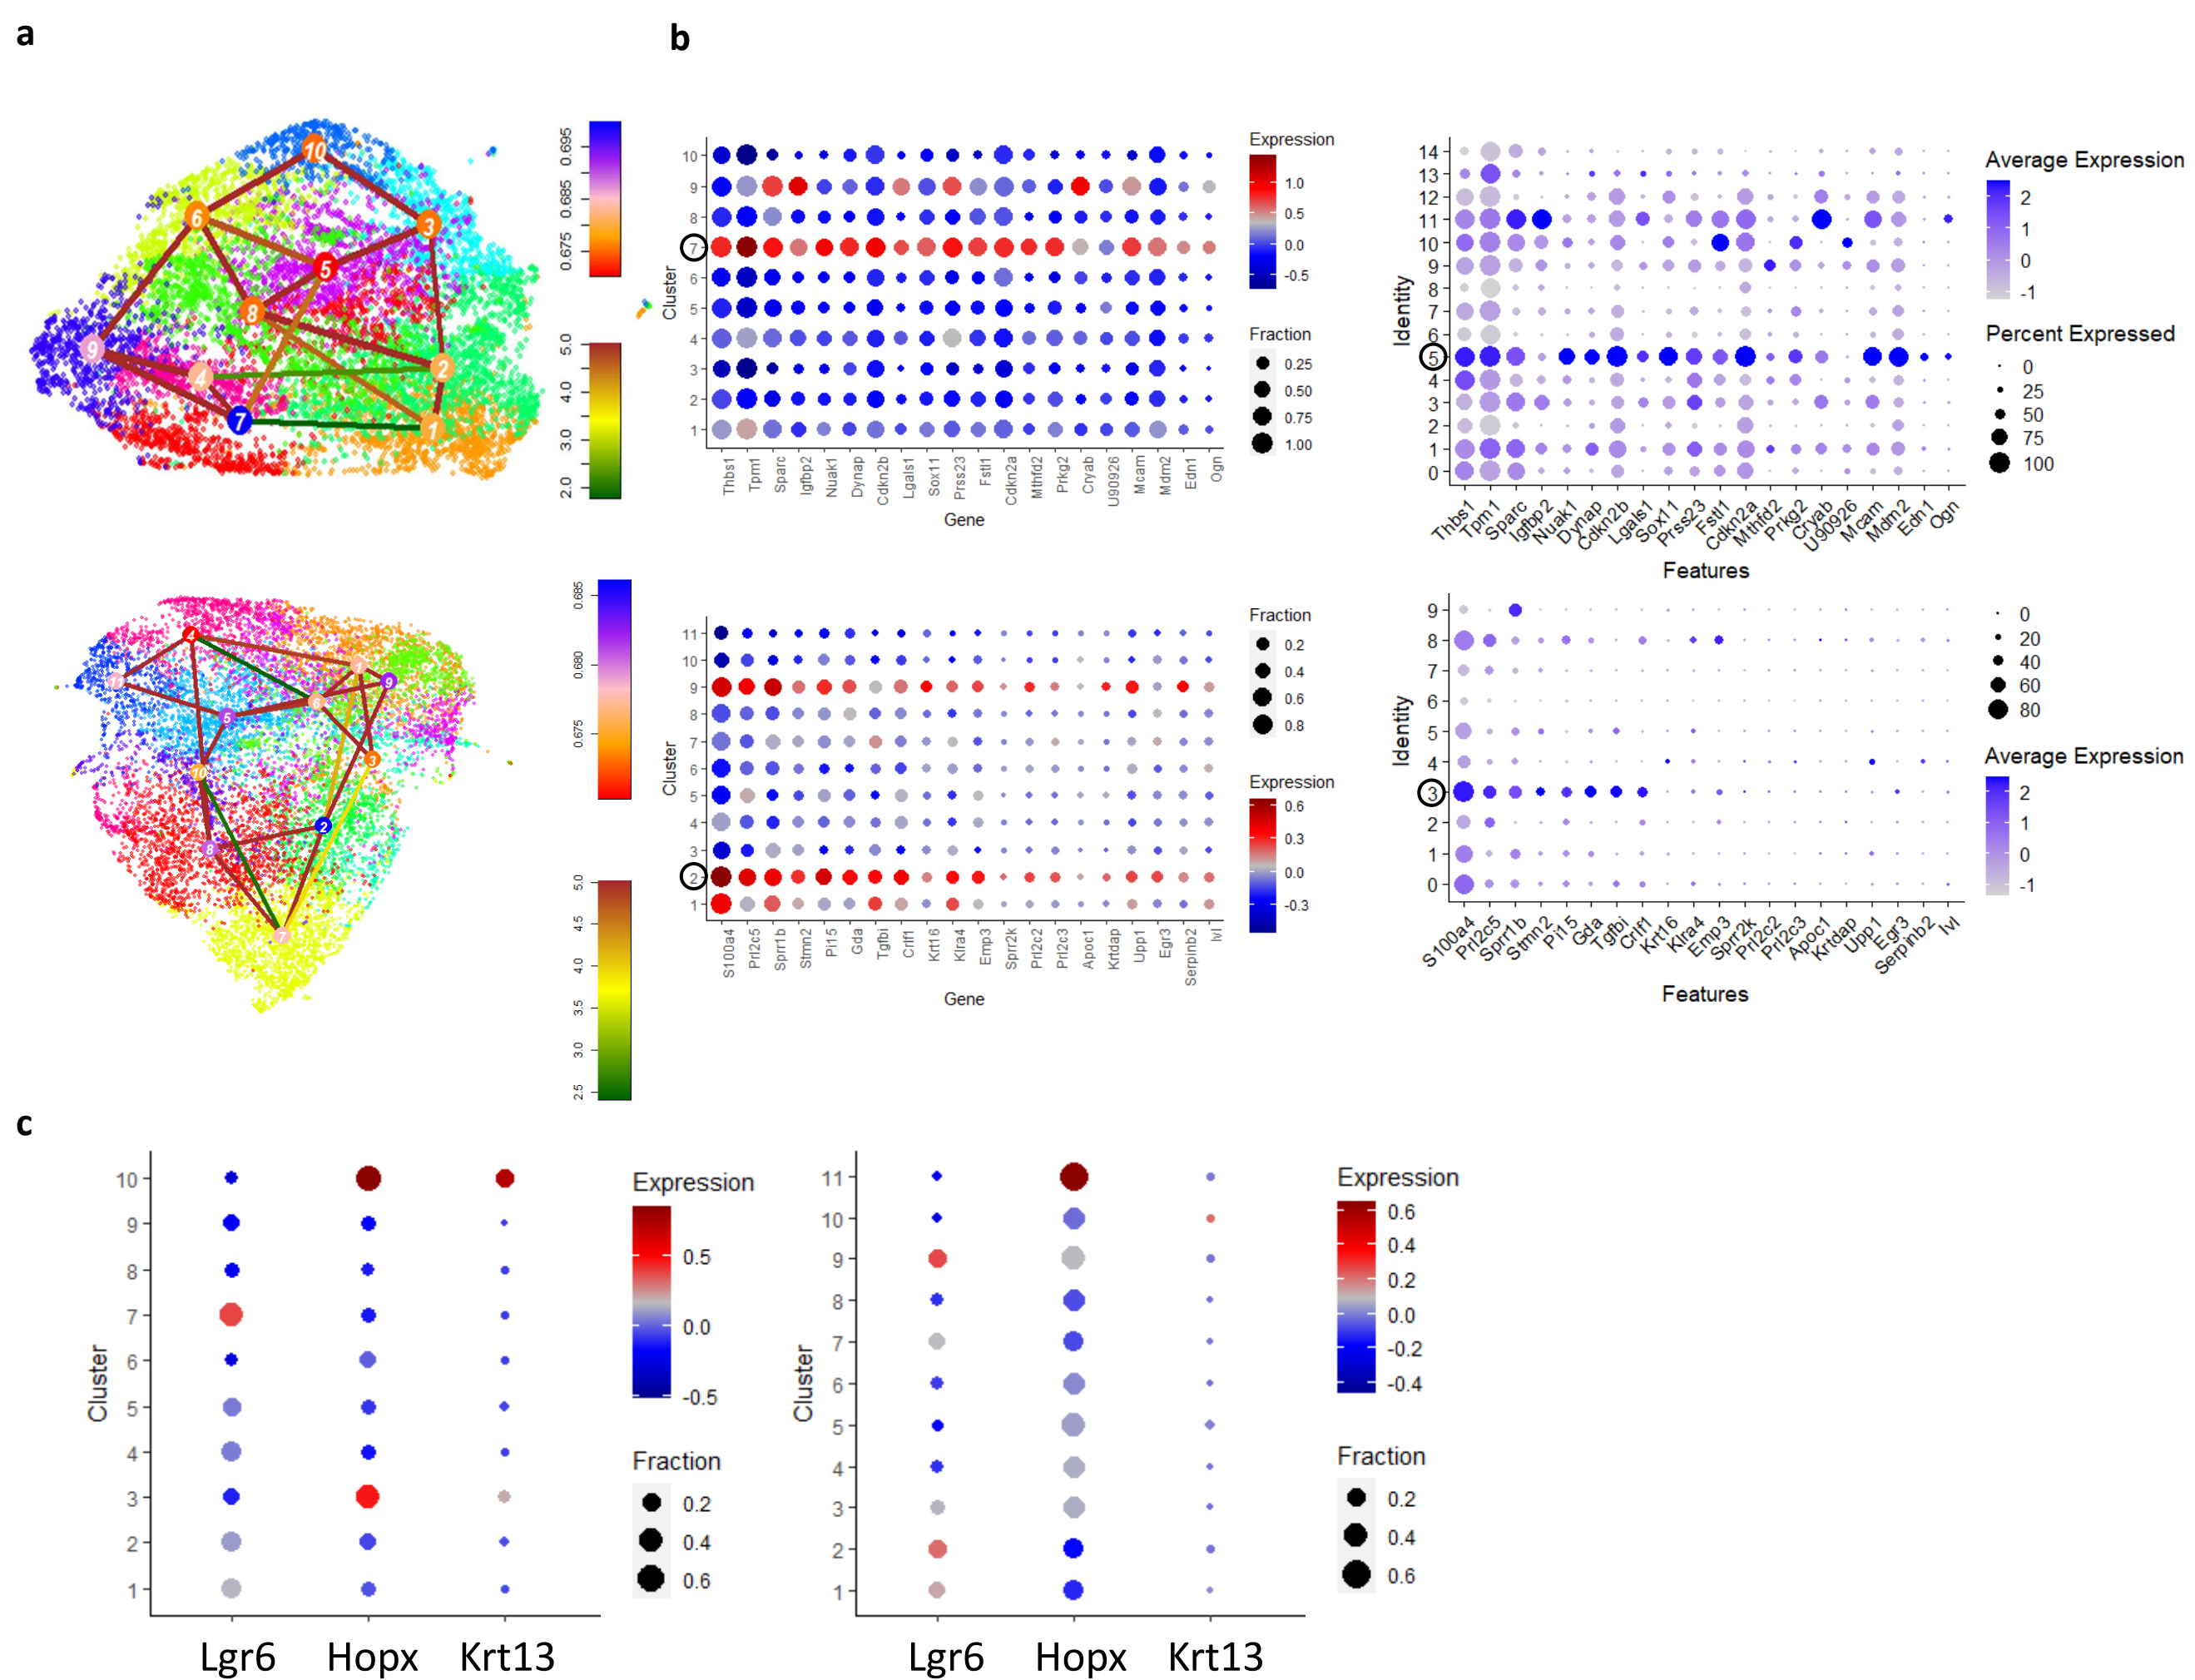

**Supplementary Figure 1.** (a) Uniform Manifold Approximation and Projection (UMAP) plots of control (upper) and cancer (lower) organoid RaceID datasets with superimposed lineage trees. (b) Dot plots of the top 20 marker genes for clusters with high StemID scores in the RaceID objects (left) and corresponding Seurat objects (right). Upper panel: control, lower panel: cancer. RaceID cluster 7 corresponds to Seurat cluster 5 for the control organoid data set, while RaceID cluster 2 corresponds to Seurat cluster 3 for the cancer organoid dataset. (c) Dot plots of selected genes in the control (left) and cancer (right) RaceID objects.

**a**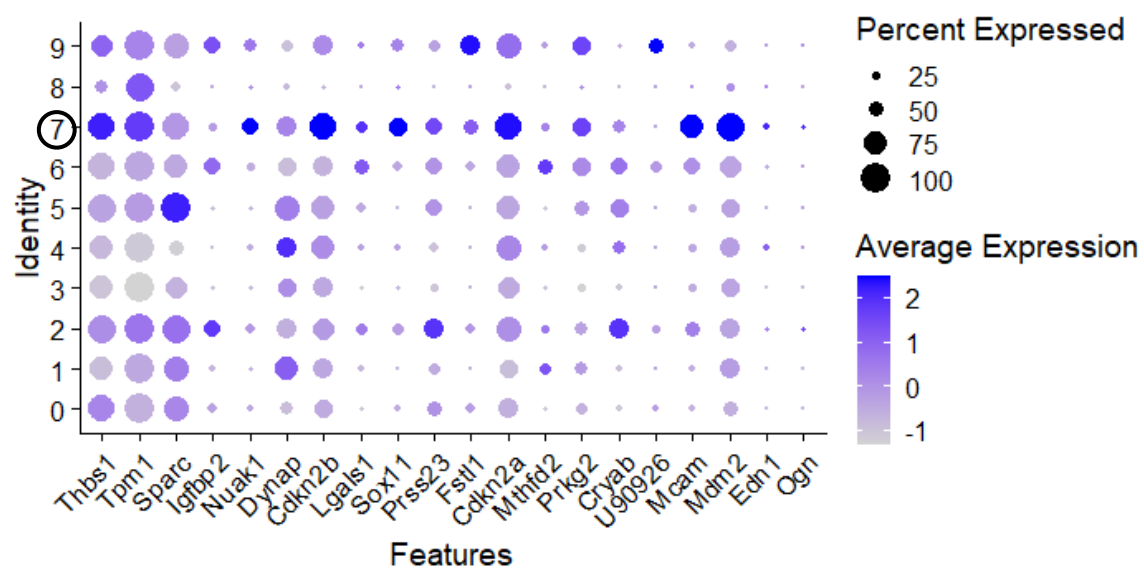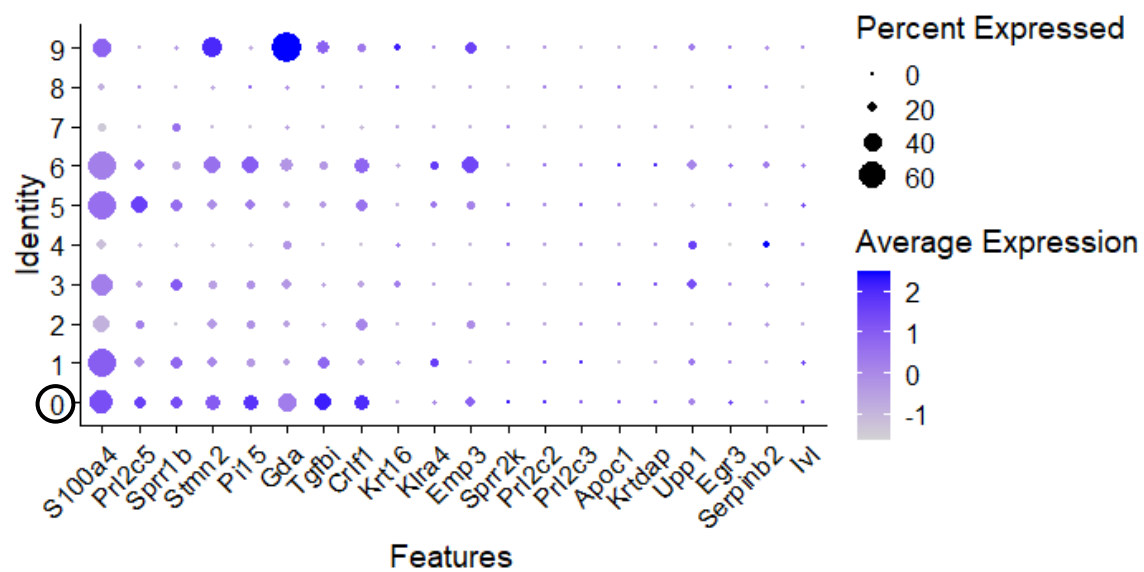**b**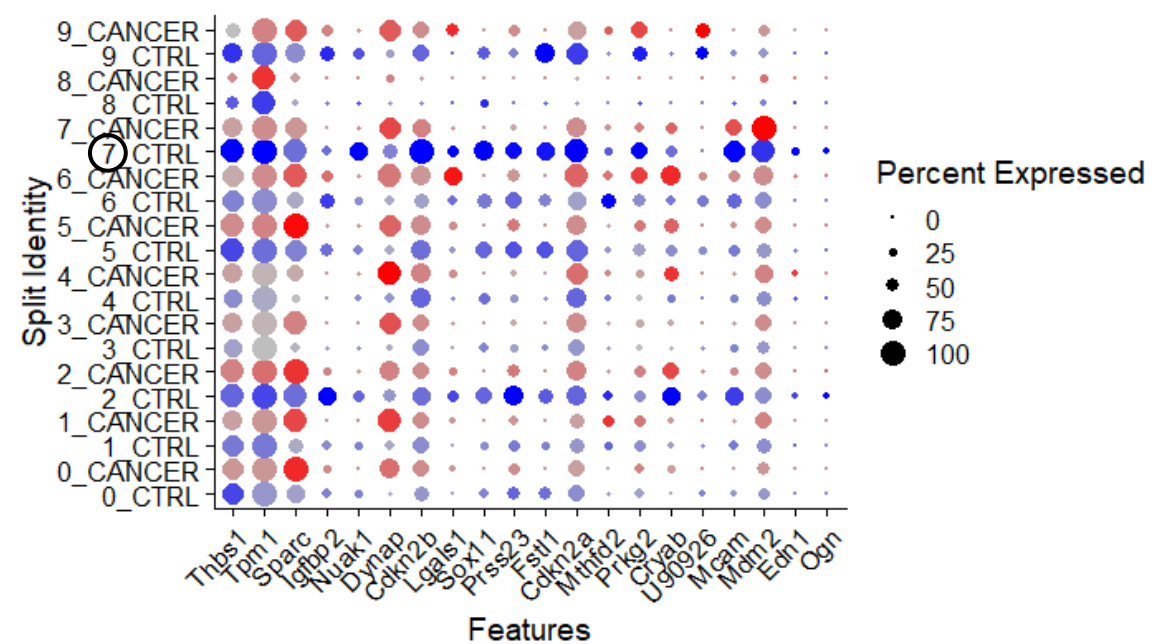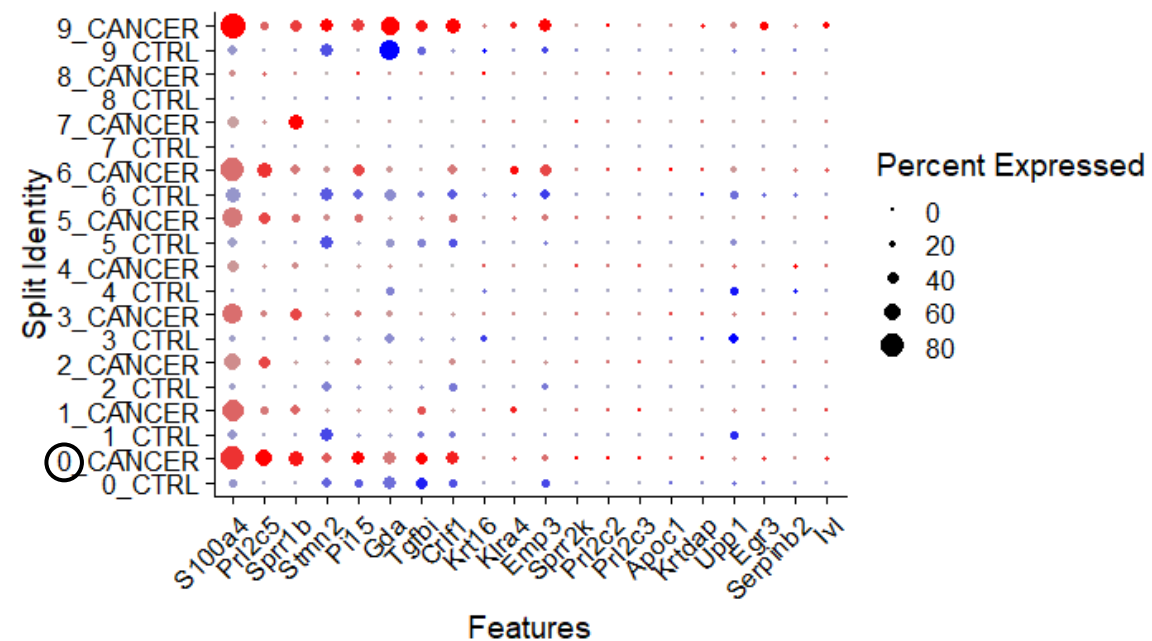

**Supplementary Figure 2.** Dot plots showing the expression of the top 20 markers in the stem cell clusters in the control (upper panel) and cancer (lower panel) objects in the integrated Seurat object without (a) or with (b) separation of the control and cancer objects. Control cluster 5 and cancer cluster 3 corresponds to cluster 7 and 0, respectively, in the integrated object.

Supplementary Table 1

| gene          | p_val       | avg_log2FC | pct.1 | pct.2 | p_val_adj |
|---------------|-------------|------------|-------|-------|-----------|
| Cdkn1a        | 2,34E-304   | 2,770536   | 1     | 0.952 | 4,67E-301 |
| Cldn4         | 3,71E-282   | 2,767630   | 0.995 | 0.672 | 7,42E-279 |
| Mdm2          | 3,28E-260   | 2,299156   | 0.989 | 0.732 | 6,55E-257 |
| Gdf15         | 1,55E-281   | 1,996064   | 0.935 | 0.544 | 3,09E-278 |
| Trp53inp1     | 2,04E-233   | 1,814635   | 0.968 | 0.606 | 4,08E-230 |
| Sncg          | 9,88E-137   | 1,696742   | 0.998 | 0.987 | 1,98E-133 |
| Ccng1         | 1,12E-262   | 1,688435   | 0.984 | 0.519 | 2,23E-259 |
| Notch1        | 5,83E-157   | 1,443518   | 0.988 | 0.81  | 1,17E-153 |
| Rps27l        | 4,51E-276   | 1,396875   | 1     | 0.963 | 9,02E-273 |
| Zfp750        | 3,95E-270   | 1,381228   | 0.926 | 0.442 | 7,89E-267 |
| Btg2          | 5,69E-142   | 1,370517   | 0.995 | 0.931 | 1,14E-138 |
| 9530053A07Rik | 1,82E-257   | 1,255515   | 0.942 | 0.596 | 3,65E-254 |
| Bax           | 8,16E-168   | 1,118611   | 0.981 | 0.872 | 1,63E-164 |
| Krt8          | 6,68E-94    | 1,112708   | 0.979 | 0.901 | 1,34E-90  |
| Krt18         | 2,03E-111   | 1,101930   | 0.993 | 0.901 | 4,07E-108 |
| Fgfbp1        | 1,22E-168   | 1,101181   | 0.949 | 0.545 | 2,44E-165 |
| Ppbp          | 6,38E-88    | 1,100529   | 0.85  | 0.612 | 1,28E-84  |
| Jund          | 1,91E-131   | 1,079910   | 1     | 0.992 | 3,81E-128 |
| Ptp4a3        | 1,88E-152   | 1,077122   | 0.975 | 0.72  | 3,76E-149 |
| Tubb4b        | 2,87E-115   | 1,064924   | 0.989 | 0.885 | 5,73E-112 |
| Ly6d          | 0,000515666 | 1,021791   | 0.549 | 0.493 | 1         |
| Pkp1          | 4,16E-117   | 1,005449   | 0.977 | 0.881 | 8,31E-114 |
| mt-Cytb       | 2,12E-148   | 0,990866   | 0.989 | 0.97  | 4,25E-145 |
| Ces2e         | 4,35E-205   | 0,990113   | 0.933 | 0.617 | 8,69E-202 |
| Pmaip1        | 2,09E-145   | 0,988161   | 0.905 | 0.492 | 4,19E-142 |
| Psrc1         | 8,24E-161   | 0,987944   | 0.88  | 0.541 | 1,65E-157 |
| Dcxr          | 2,87E-117   | 0,985828   | 0.993 | 0.907 | 5,73E-114 |
| Nectin4       | 1,44E-180   | 0,965481   | 0.903 | 0.617 | 2,88E-177 |
| Gabrp         | 2,76E-145   | 0,960147   | 0.848 | 0.583 | 5,52E-142 |
| Atg9b         | 1,74E-89    | 0,943166   | 0.824 | 0.642 | 3,47E-86  |
| Siva1         | 9,97E-126   | 0,920861   | 0.998 | 0.935 | 1,99E-122 |
| Fosb          | 5,23E-52    | 0,876238   | 0.949 | 0.864 | 1,05E-48  |
| Hist1h1c      | 2,08E-103   | 0,872742   | 0.905 | 0.742 | 4,17E-100 |
| Cox6b2        | 4,73E-128   | 0,865943   | 0.727 | 0.256 | 9,46E-125 |
| Mcam          | 1,39E-120   | 0,859410   | 0.776 | 0.242 | 2,78E-117 |
| Cryab         | 6,20E-45    | 0,859297   | 0.808 | 0.668 | 1,24E-41  |
| Bcl2l11       | 8,79E-112   | 0,854910   | 0.914 | 0.586 | 1,76E-108 |
| Tnfsf9        | 1,08E-150   | 0,827513   | 0.935 | 0.662 | 2,16E-147 |
| Net1          | 3,68E-64    | 0,819738   | 0.986 | 0.864 | 7,37E-61  |
| Ly6e          | 6,71E-118   | 0,800575   | 0.998 | 0.978 | 1,34E-114 |
| Dusp1         | 1,14E-53    | 0,789082   | 0.975 | 0.912 | 2,28E-50  |
| Ckmt1         | 1,95E-87    | 0,778872   | 0.869 | 0.625 | 3,89E-84  |
| Lgals1        | 0,650384741 | 0,744070   | 0.536 | 0.6   | 1         |
| Bst2          | 4,70E-101   | 0,740072   | 0.862 | 0.707 | 9,40E-98  |
| Tob1          | 1,48E-113   | 0,725308   | 0.951 | 0.748 | 2,97E-110 |
| Tacstd2       | 1,02E-10    | 0,722017   | 0.977 | 0.907 | 2,03E-07  |
| S100a14       | 8,85E-59    | 0,715534   | 1     | 0.999 | 1,77E-55  |

|           |             |          |       |       |             |
|-----------|-------------|----------|-------|-------|-------------|
| Ces2g     | 1,92E-178   | 0,710535 | 0.896 | 0.544 | 3,84E-175   |
| mt-Nd4    | 9,22E-86    | 0,701311 | 0.996 | 0.98  | 1,84E-82    |
| Anxa1     | 0,008048954 | 0,697243 | 0.996 | 0.993 | 1           |
| Robo3     | 1,30E-172   | 0,696769 | 0.832 | 0.479 | 2,61E-169   |
| Ddit4l    | 1,97E-54    | 0,696739 | 0.695 | 0.323 | 3,95E-51    |
| Sat1      | 3,37E-48    | 0,692864 | 0.991 | 0.969 | 6,73E-45    |
| Gsto1     | 4,03E-50    | 0,692366 | 0.998 | 0.984 | 8,06E-47    |
| Areg      | 2,79E-120   | 0,690617 | 0.859 | 0.62  | 5,59E-117   |
| Rab25     | 1,77E-63    | 0,685216 | 0.748 | 0.364 | 3,55E-60    |
| Cldn3     | 8,31E-10    | 0,674120 | 0.577 | 0.516 | 1,66E-06    |
| Atf3      | 1,30E-48    | 0,672581 | 0.966 | 0.915 | 2,61E-45    |
| Tmprss11e | 1,96E-163   | 0,671866 | 0.808 | 0.522 | 3,92E-160   |
| Ppp1r15a  | 2,57E-83    | 0,667179 | 0.947 | 0.758 | 5,13E-80    |
| Hspa1b    | 1,14E-59    | 0,658279 | 0.951 | 0.749 | 2,27E-56    |
| Hist1h2bc | 8,01E-90    | 0,653681 | 0.885 | 0.716 | 1,60E-86    |
| Nudcd2    | 2,82E-71    | 0,650049 | 0.869 | 0.564 | 5,64E-68    |
| Ddit4     | 4,13E-50    | 0,643897 | 0.942 | 0.754 | 8,25E-47    |
| Spint1    | 1,37E-49    | 0,630312 | 0.656 | 0.289 | 2,74E-46    |
| Nuak1     | 2,01E-31    | 0,623065 | 0.506 | 0.197 | 4,01E-28    |
| Dynap     | 5,19E-11    | 0,609017 | 0.961 | 0.899 | 1,04E-07    |
| Mcl1      | 3,19E-46    | 0,607318 | 0.958 | 0.879 | 6,38E-43    |
| Ccnd1     | 1,03E-15    | 0,606538 | 0.956 | 0.853 | 2,06E-12    |
| Fos       | 8,57E-09    | 0,601583 | 0.958 | 0.941 | 1,71E-05    |
| Cenpm     | 1,24E-149   | 0,597638 | 0.753 | 0.19  | 2,47E-146   |
| Ly6a      | 3,74E-12    | 0,594352 | 0.924 | 0.786 | 7,49E-09    |
| mt-Nd3    | 1,07E-48    | 0,584735 | 0.954 | 0.735 | 2,14E-45    |
| Prrg4     | 6,90E-40    | 0,576073 | 0.721 | 0.507 | 1,38E-36    |
| Ecm1      | 0,000209797 | 0,565671 | 0.975 | 0.964 | 0,419594774 |
| Fbxw9     | 9,03E-61    | 0,564767 | 0.82  | 0.612 | 1,81E-57    |
| Rgs17     | 1,49E-29    | 0,562471 | 0.561 | 0.183 | 2,98E-26    |
| Taldo1    | 1,51E-39    | 0,551217 | 0.965 | 0.87  | 3,03E-36    |
| Endod1    | 6,51E-41    | 0,548004 | 0.847 | 0.743 | 1,30E-37    |
| Dyrk3     | 6,32E-104   | 0,544213 | 0.884 | 0.646 | 1,26E-100   |
| Cpne2     | 1,74E-37    | 0,539527 | 0.552 | 0.138 | 3,47E-34    |
| Cdkn2a    | 9,75E-51    | 0,535928 | 0.901 | 0.721 | 1,95E-47    |
| Serpine2  | 1,06E-54    | 0,531747 | 0.981 | 0.91  | 2,11E-51    |
| Hspb1     | 3,20E-21    | 0,525216 | 1     | 0.999 | 6,41E-18    |
| Ftl1      | 2,41E-59    | 0,525138 | 1     | 1     | 4,81E-56    |
| Notch3    | 8,97E-07    | 0,524220 | 0.517 | 0.396 | 0,001793251 |
| H2-K1     | 3,82E-39    | 0,523682 | 0.977 | 0.87  | 7,64E-36    |
| Ptpn13    | 1,24E-47    | 0,513945 | 0.921 | 0.655 | 2,49E-44    |
| Gas6      | 2,82E-15    | 0,509913 | 0.527 | 0.19  | 5,65E-12    |
| mt-Atp6   | 2,23E-46    | 0,509591 | 0.995 | 0.995 | 4,46E-43    |
| Plk2      | 1,87E-30    | 0,507099 | 0.935 | 0.9   | 3,75E-27    |
| Hspa1a    | 1,67E-90    | 0,506225 | 0.855 | 0.448 | 3,33E-87    |
| Avpi1     | 2,03E-34    | 0,502517 | 0.995 | 0.971 | 4,06E-31    |
| Mybl1     | 4,09E-20    | 0,497584 | 0.519 | 0.278 | 8,18E-17    |
| mt-Co3    | 5,54E-64    | 0,487456 | 0.998 | 0.999 | 1,11E-60    |
| Hspb8     | 1,98E-51    | 0,482611 | 0.933 | 0.76  | 3,95E-48    |
| Tpm1      | 1,23E-41    | 0,482481 | 1     | 0.999 | 2,46E-38    |

|       |          |          |       |       |             |
|-------|----------|----------|-------|-------|-------------|
| Cxcl1 | 4,72E-19 | 0,480041 | 0.813 | 0.578 | 9,44E-16    |
| Cldn7 | 2,62E-07 | 0,476114 | 0.423 | 0.152 | 0,000524371 |
| Hspa9 | 1,61E-35 | 0,469363 | 0.889 | 0.771 | 3,22E-32    |

Supplementary Table 2

| gene          | p_val       | avg_log2FC | pct.1 | pct.2 | p_val_adj |
|---------------|-------------|------------|-------|-------|-----------|
| Sostdc1       | 4,43E-247   | 2,387375   | 0.995 | 0.899 | 8,85E-244 |
| S100a4        | 1,86E-222   | 2,363231   | 0.934 | 0.829 | 3,72E-219 |
| Wfdc18        | 7,63E-150   | 1,924669   | 1     | 0.989 | 1,53E-146 |
| Cbr2          | 1,10E-165   | 1,776824   | 0.932 | 0.783 | 2,20E-162 |
| Prl2c5        | 3,51E-107   | 1,728556   | 0.798 | 0.75  | 7,02E-104 |
| Rbp1          | 2,43E-211   | 1,707190   | 1     | 0.951 | 4,86E-208 |
| Lgals7        | 1,16E-194   | 1,580235   | 1     | 0.977 | 2,32E-191 |
| Lcn2          | 1,14E-78    | 1,482994   | 0.842 | 0.566 | 2,28E-75  |
| Crabp2        | 4,65E-132   | 1,382736   | 0.992 | 0.945 | 9,30E-129 |
| Ndufa4l2      | 6,50E-81    | 1,361223   | 0.906 | 0.882 | 1,30E-77  |
| 2610528A11Rik | 2,30E-66    | 1,206832   | 0.829 | 0.804 | 4,61E-63  |
| Tmem176a      | 3,44E-193   | 1,200377   | 1     | 0.989 | 6,87E-190 |
| Krt14         | 7,20E-166   | 1,147948   | 1     | 0.991 | 1,44E-162 |
| Pgf           | 1,07E-157   | 1,076795   | 0.908 | 0.806 | 2,13E-154 |
| Fabp5         | 1,18E-64    | 1,064522   | 0.777 | 0.591 | 2,36E-61  |
| Id3           | 1,31E-97    | 1,057633   | 0.798 | 0.344 | 2,62E-94  |
| Hif1a         | 4,96E-129   | 1,055590   | 0.958 | 0.795 | 9,92E-126 |
| Defb1         | 2,76E-113   | 1,041730   | 0.808 | 0.728 | 5,53E-110 |
| Krt17         | 6,50E-125   | 1,021067   | 1     | 0.998 | 1,30E-121 |
| Itga6         | 6,36E-141   | 1,020027   | 0.962 | 0.797 | 1,27E-137 |
| Tns4          | 3,35E-124   | 1,013758   | 0.976 | 0.765 | 6,71E-121 |
| Cp            | 2,98E-98    | 1,009351   | 0.931 | 0.785 | 5,97E-95  |
| Klk8          | 1,45E-141   | 0,987998   | 0.97  | 0.852 | 2,91E-138 |
| Crip1         | 6,77E-76    | 0,978201   | 0.867 | 0.797 | 1,35E-72  |
| Golim4        | 4,38E-125   | 0,974736   | 0.994 | 0.979 | 8,76E-122 |
| Sgk1          | 1,39E-96    | 0,972217   | 0.913 | 0.656 | 2,79E-93  |
| Stra6         | 1,51E-103   | 0,964384   | 0.843 | 0.524 | 3,03E-100 |
| Trp63         | 3,85E-113   | 0,963742   | 0.83  | 0.448 | 7,69E-110 |
| Igfbp7        | 4,00E-97    | 0,958897   | 0.988 | 0.852 | 7,99E-94  |
| Enpp1         | 8,12E-93    | 0,954819   | 0.827 | 0.709 | 1,62E-89  |
| Tagln2        | 4,41E-125   | 0,951956   | 0.998 | 0.988 | 8,82E-122 |
| Ucp2          | 2,59E-93    | 0,943787   | 0.794 | 0.494 | 5,18E-90  |
| Stmn2         | 1,18E-13    | 0,938207   | 0.541 | 0.594 | 2,36E-10  |
| Cav1          | 2,88E-106   | 0,920255   | 0.963 | 0.884 | 5,76E-103 |
| Mgp           | 0,135230365 | 0,919972   | 0.464 | 0.601 | 1         |
| 4930523C07Rik | 1,78E-98    | 0,882987   | 0.898 | 0.776 | 3,55E-95  |
| Krt5          | 4,03E-120   | 0,859438   | 1     | 0.998 | 8,06E-117 |
| Pglyrp1       | 5,16E-38    | 0,829077   | 0.898 | 0.859 | 1,03E-34  |
| Nlrp10        | 6,56E-86    | 0,812628   | 0.959 | 0.903 | 1,31E-82  |
| Sparc         | 9,47E-74    | 0,810317   | 0.994 | 0.949 | 1,89E-70  |
| S100a10       | 6,91E-144   | 0,806966   | 1     | 0.996 | 1,38E-140 |
| Cebpd         | 6,66E-22    | 0,796432   | 0.732 | 0.824 | 1,33E-18  |
| Plec          | 2,06E-84    | 0,793668   | 0.814 | 0.554 | 4,12E-81  |
| Sprr1a        | 1,73E-14    | 0,777241   | 0.869 | 0.898 | 3,47E-11  |
| Tnfaip2       | 7,66E-62    | 0,775376   | 0.62  | 0.386 | 1,53E-58  |
| Igfbp3        | 5,52E-54    | 0,771358   | 0.797 | 0.54  | 1,10E-50  |
| Id1           | 3,45E-32    | 0,765363   | 0.804 | 0.725 | 6,91E-29  |

|               |           |          |       |       |           |
|---------------|-----------|----------|-------|-------|-----------|
| Efemp1        | 7,15E-70  | 0,762482 | 0.801 | 0.515 | 1,43E-66  |
| S100a6        | 1,87E-88  | 0,753406 | 1     | 1     | 3,74E-85  |
| Ndrp1         | 3,10E-52  | 0,751486 | 0.97  | 0.944 | 6,20E-49  |
| Slc15a2       | 2,41E-71  | 0,723823 | 0.8   | 0.748 | 4,81E-68  |
| Tmem176b      | 1,23E-95  | 0,716492 | 1     | 0.995 | 2,46E-92  |
| Ctgf          | 1,03E-33  | 0,713689 | 0.819 | 0.66  | 2,07E-30  |
| Car12         | 1,45E-53  | 0,710657 | 0.744 | 0.725 | 2,90E-50  |
| Actb          | 2,33E-84  | 0,709100 | 1     | 1     | 4,66E-81  |
| Cavin3        | 4,45E-70  | 0,702263 | 0.908 | 0.771 | 8,90E-67  |
| Cyr61         | 1,09E-50  | 0,699950 | 0.863 | 0.598 | 2,19E-47  |
| Dag1          | 1,46E-64  | 0,699525 | 0.964 | 0.919 | 2,92E-61  |
| Gda           | 1,35E-67  | 0,698582 | 0.593 | 0.314 | 2,70E-64  |
| Csrp1         | 2,16E-55  | 0,698552 | 0.928 | 0.884 | 4,33E-52  |
| Clu           | 2,81E-83  | 0,696456 | 0.886 | 0.547 | 5,62E-80  |
| Calm1         | 2,64E-65  | 0,689992 | 0.981 | 0.931 | 5,28E-62  |
| Malat1        | 2,70E-25  | 0,686900 | 0.998 | 0.998 | 5,39E-22  |
| Tubb5         | 7,13E-80  | 0,685919 | 0.995 | 0.952 | 1,43E-76  |
| Vsnl1         | 1,98E-56  | 0,685513 | 0.682 | 0.436 | 3,96E-53  |
| Gpx2          | 3,97E-55  | 0,680201 | 0.904 | 0.905 | 7,94E-52  |
| Serpinc5      | 3,57E-64  | 0,675567 | 0.96  | 0.942 | 7,14E-61  |
| Cavin1        | 1,86E-64  | 0,674863 | 0.841 | 0.66  | 3,71E-61  |
| Prdx6         | 2,06E-87  | 0,674587 | 0.992 | 0.965 | 4,12E-84  |
| Mt1           | 1,83E-44  | 0,666930 | 0.968 | 0.949 | 3,67E-41  |
| Vwa1          | 6,63E-50  | 0,663095 | 0.776 | 0.755 | 1,33E-46  |
| Gja1          | 8,85E-45  | 0,657974 | 0.892 | 0.869 | 1,77E-41  |
| Bzw2          | 4,41E-62  | 0,649735 | 0.904 | 0.799 | 8,82E-59  |
| Pgk1          | 3,07E-89  | 0,636850 | 1     | 0.998 | 6,13E-86  |
| Lamb3         | 4,29E-68  | 0,636544 | 0.929 | 0.716 | 8,58E-65  |
| Snai2         | 3,95E-43  | 0,631253 | 0.896 | 0.825 | 7,90E-40  |
| 4631405K08Rik | 1,95E-55  | 0,617270 | 0.891 | 0.804 | 3,89E-52  |
| Ehf           | 9,85E-55  | 0,613805 | 0.967 | 0.959 | 1,97E-51  |
| Sorbs2        | 1,60E-48  | 0,609388 | 0.601 | 0.31  | 3,20E-45  |
| Glul          | 1,31E-31  | 0,606229 | 0.926 | 0.875 | 2,61E-28  |
| Arhgdib       | 2,77E-37  | 0,604768 | 0.874 | 0.825 | 5,53E-34  |
| Dram1         | 6,27E-93  | 0,601208 | 0.579 | 0.201 | 1,25E-89  |
| Crlf1         | 3,01E-161 | 0,598349 | 0.668 | 0.12  | 6,01E-158 |
| Tgfbi         | 9,29E-41  | 0,593716 | 0.507 | 0.243 | 1,86E-37  |
| Hlf           | 1,83E-20  | 0,590498 | 0.783 | 0.799 | 3,66E-17  |
| Anxa2         | 2,98E-53  | 0,590367 | 0.999 | 0.995 | 5,97E-50  |
| Zfp36l2       | 4,66E-45  | 0,588861 | 0.786 | 0.57  | 9,33E-42  |
| Pi15          | 2,07E-33  | 0,584085 | 0.686 | 0.728 | 4,15E-30  |
| Tspo          | 3,91E-51  | 0,573011 | 0.972 | 0.958 | 7,82E-48  |
| Rbbp8         | 1,69E-65  | 0,571301 | 0.617 | 0.296 | 3,38E-62  |
| Pls3          | 8,43E-46  | 0,567762 | 0.874 | 0.771 | 1,69E-42  |
| Tmsb10        | 1,37E-54  | 0,564331 | 0.997 | 0.956 | 2,73E-51  |
| Has2          | 1,63E-39  | 0,558875 | 0.468 | 0.238 | 3,26E-36  |
| Hnrnpa3       | 4,49E-54  | 0,557918 | 0.941 | 0.903 | 8,98E-51  |
| Dst           | 2,30E-45  | 0,553209 | 0.863 | 0.667 | 4,60E-42  |
| Higd1a        | 7,62E-31  | 0,552354 | 0.969 | 0.954 | 1,52E-27  |
| Fth1          | 2,82E-77  | 0,551775 | 1     | 1     | 5,64E-74  |



|         |          |          |       |       |          |
|---------|----------|----------|-------|-------|----------|
| Spr2a3  | 2,96E-31 | 0,549058 | 0.438 | 0.741 | 5,92E-28 |
| Slc39a4 | 9,66E-76 | 0,548483 | 0.771 | 0.732 | 1,93E-72 |
| Ero1l   | 2,31E-39 | 0,547443 | 0.997 | 0.989 | 4,63E-36 |
